# Supplementary material for: A new method (M 3 Fusion v1) for combining observations and multiple model output for an improved estimate of the global surface ozone distribution
Source: Copernicus journal article supplement (doi:10.5194/gmd-12-955-2019), 2019-03-12
Supplement: Supplementary file 1 [file gmd-12-955-2019-supplement.zip]

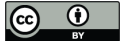

## *Supplement of*

# **A new method (M<sup>3</sup>Fusion v1) for combining observations and multiple model output for an improved estimate of the global surface ozone distribution**

**K.-L. Chang et al.**

*Correspondence to:* Kai-Lan Chang ([kai-lan.chang@noaa.gov](mailto:kai-lan.chang@noaa.gov))

- [gmd-12-955-2019-supplement-title-page.pdf](#)
- M3Fusion\_code
  - .DS\_Store
  - M3Fusion\_code
    - \* 1.Model\_MDA8\_metric.R
    - \* 1.Observations\_SPDE\_kriging.R
    - \* 2.Regional\_weighting.R
    - \* 3.Bias\_correction.R
    - \* README.txt
    - \* land.csv
    - \* miscellaneous\_plot\_functions.R
  - SupplementalMaterial.pdf

The copyright of individual parts of the supplement might differ from the CC BY 4.0 License.
