# Supplementary material for: A new method (M 3 Fusion v1) for combining observations and multiple model output for an improved estimate of the global surface ozone distribution
Source: Copernicus journal article supplement (doi:10.5194/gmd-12-955-2019), 2019-03-12
Supplement: Supplementary file 2 [file gmd-12-955-2019-supplement.zip]

List of Figures

S-1 Global distributions of the ozone metric from ensemble members. . . . . 2

S-2 Strong ozone discontinuities, or artefacts, were present along the geometric boundaries, especially in western China, before a spline smoothing was employed. The smoothing is only applied to 3 regions: one horizontal discontinuity between Russia and East/South Asia, one vertical discontinuity between East and South Asia, and one vertical discontinuity between South Asia and Africa. . . . . 3

S-3 The multi-model bias corrected surface under different ranges of correction radius. . . . . 4

S-4 Amplitudes of multi-model bias correction under different ranges of correction radius. . . . . 5

S-5 The empirical variogram of ozone metric in North America from each model and product. . . . . 6

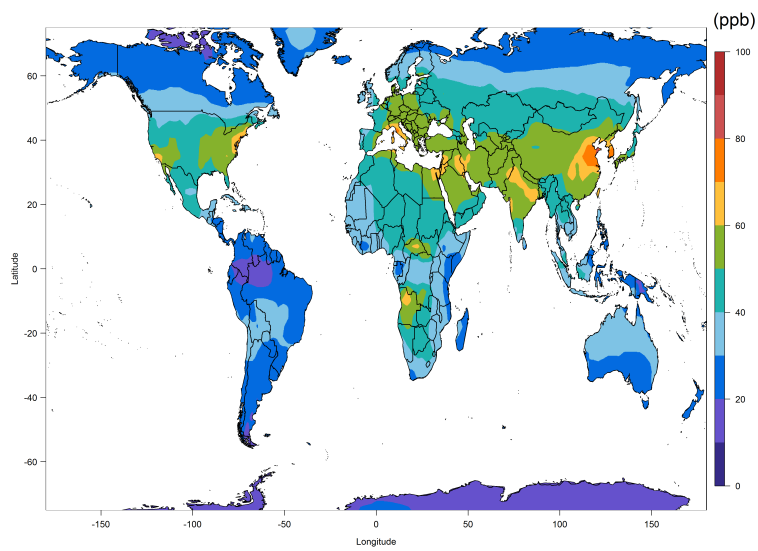

(a) CHASER

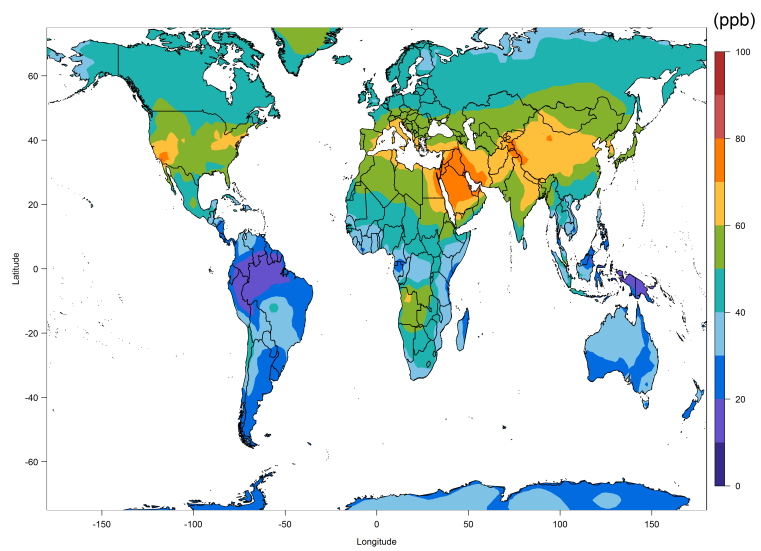

(b) GEOSCCM

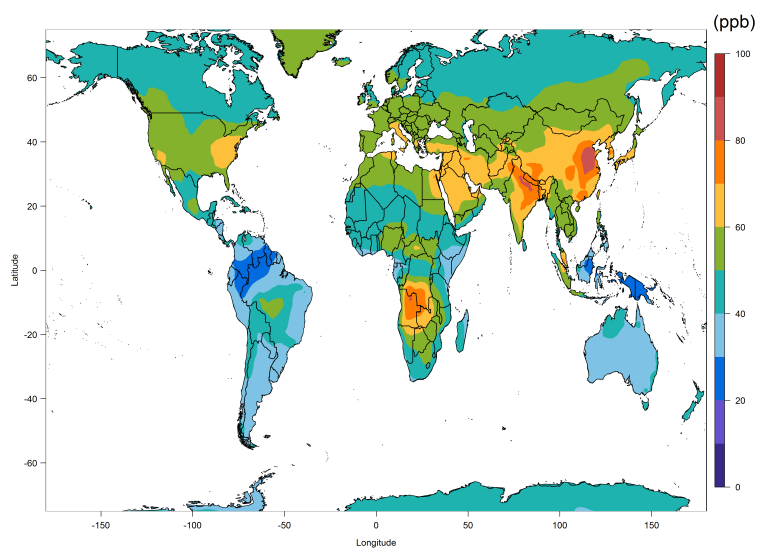

(c) GFDL-AM3

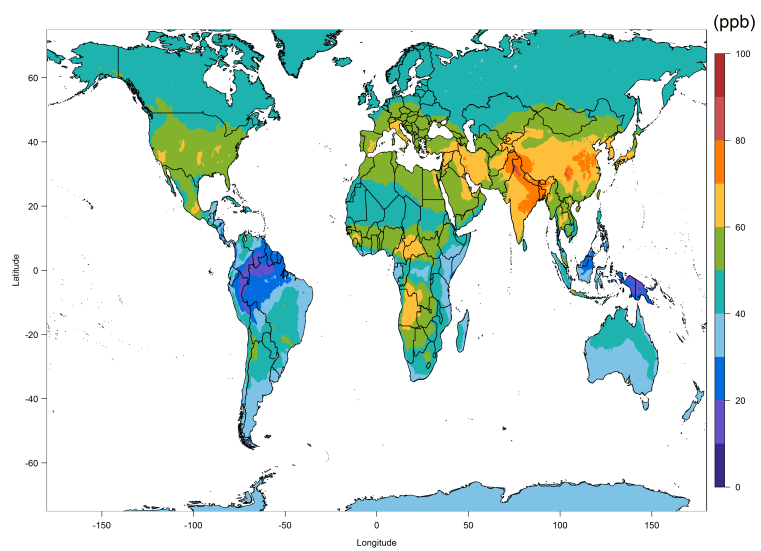

(d) G5NR-Chem

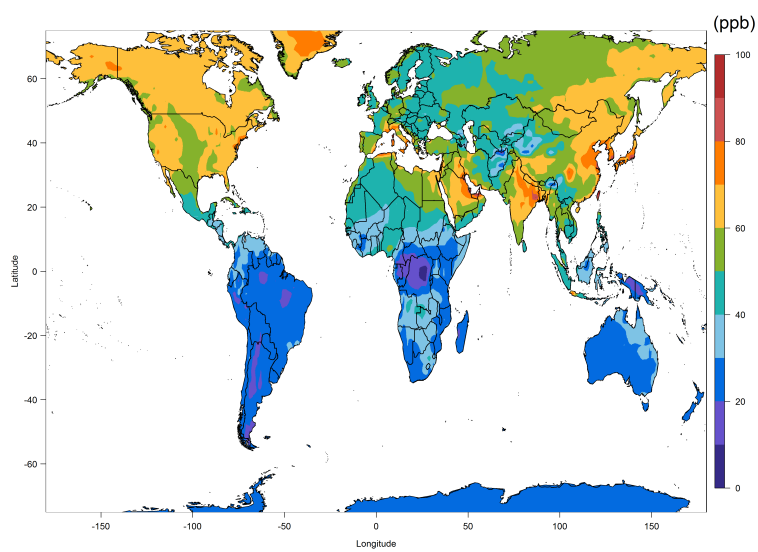

(e) MOCAGE

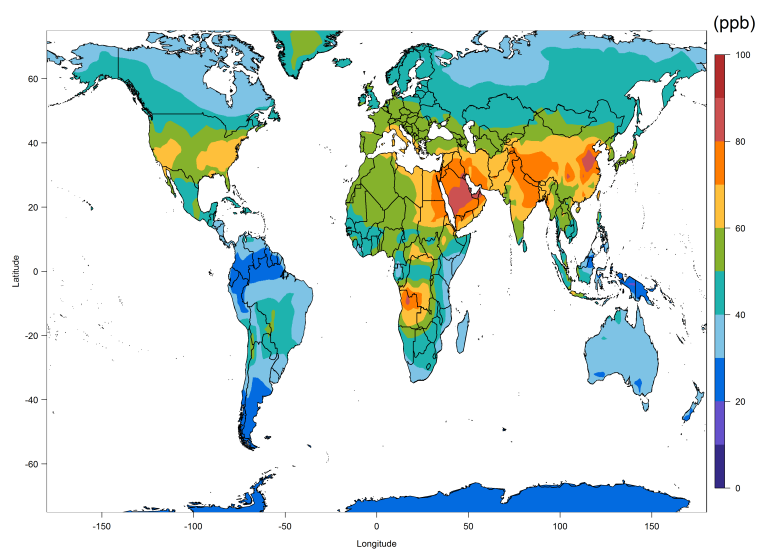

(f) MRIESM1r1

**Figure S-1:** Global distributions of the ozone metric from ensemble members.

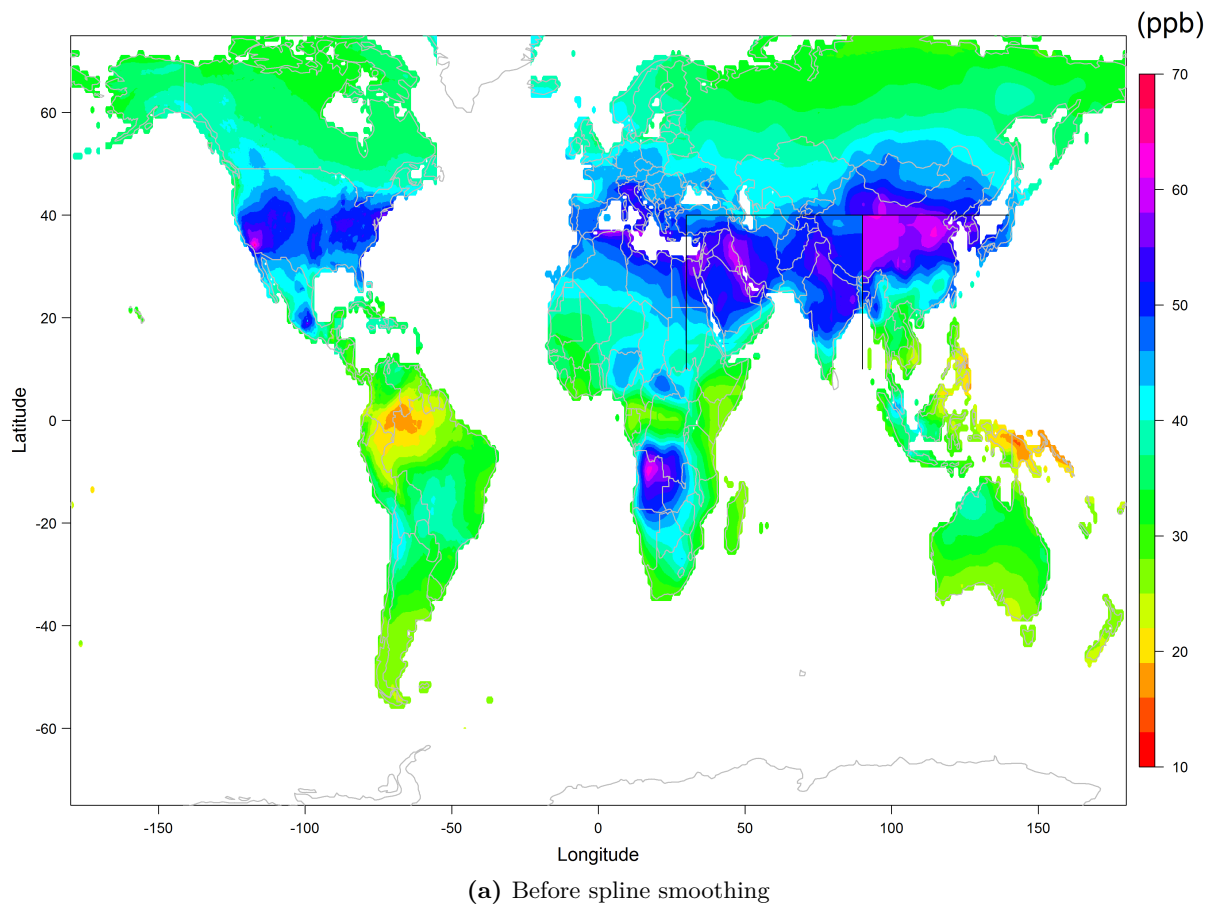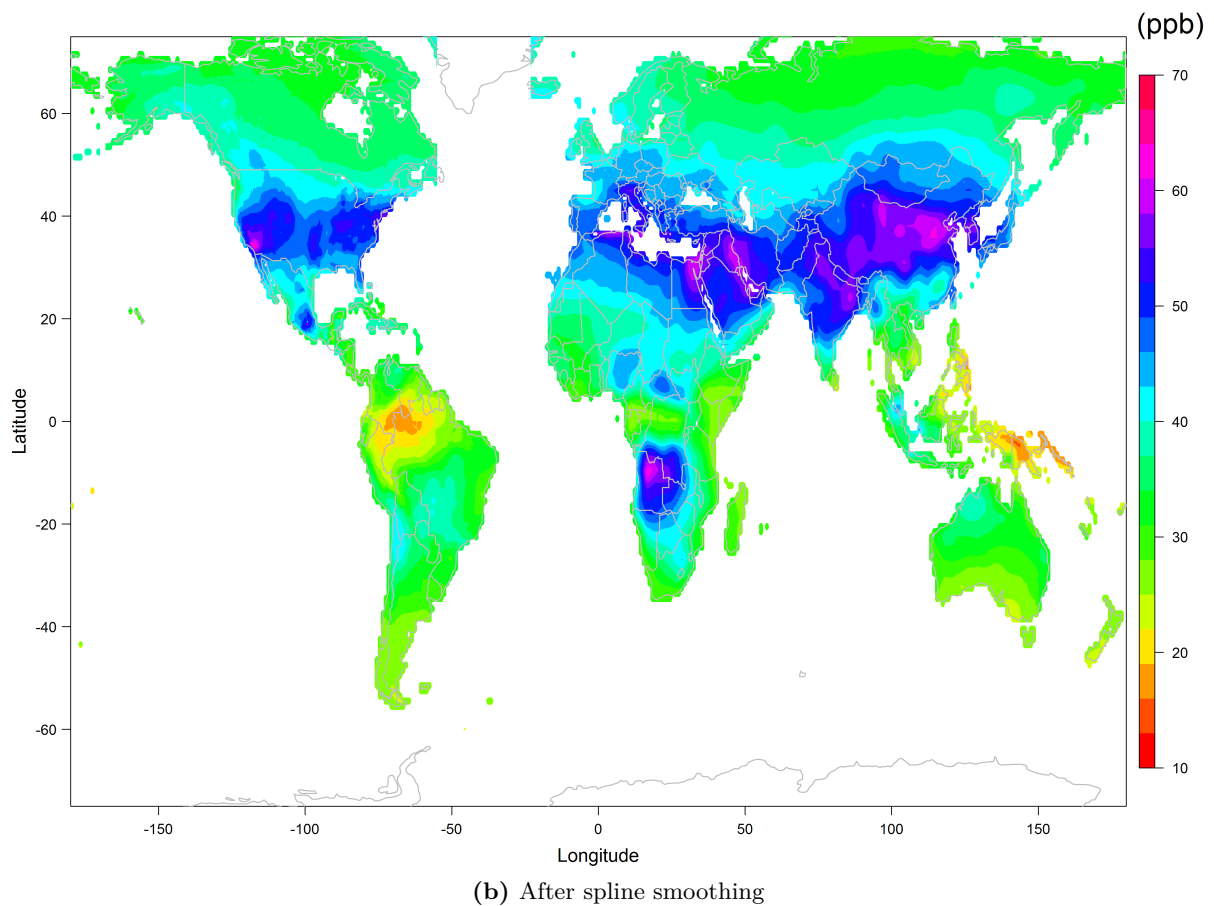

**Figure S-2:** Strong ozone discontinuities, or artefacts, were present along the geometric boundaries, especially in western China, before a spline smoothing was employed. The smoothing is only applied to 3 regions: one horizontal discontinuity between Russia and East/South Asia, one vertical discontinuity between East and South Asia, and one vertical discontinuity between South Asia and Africa.

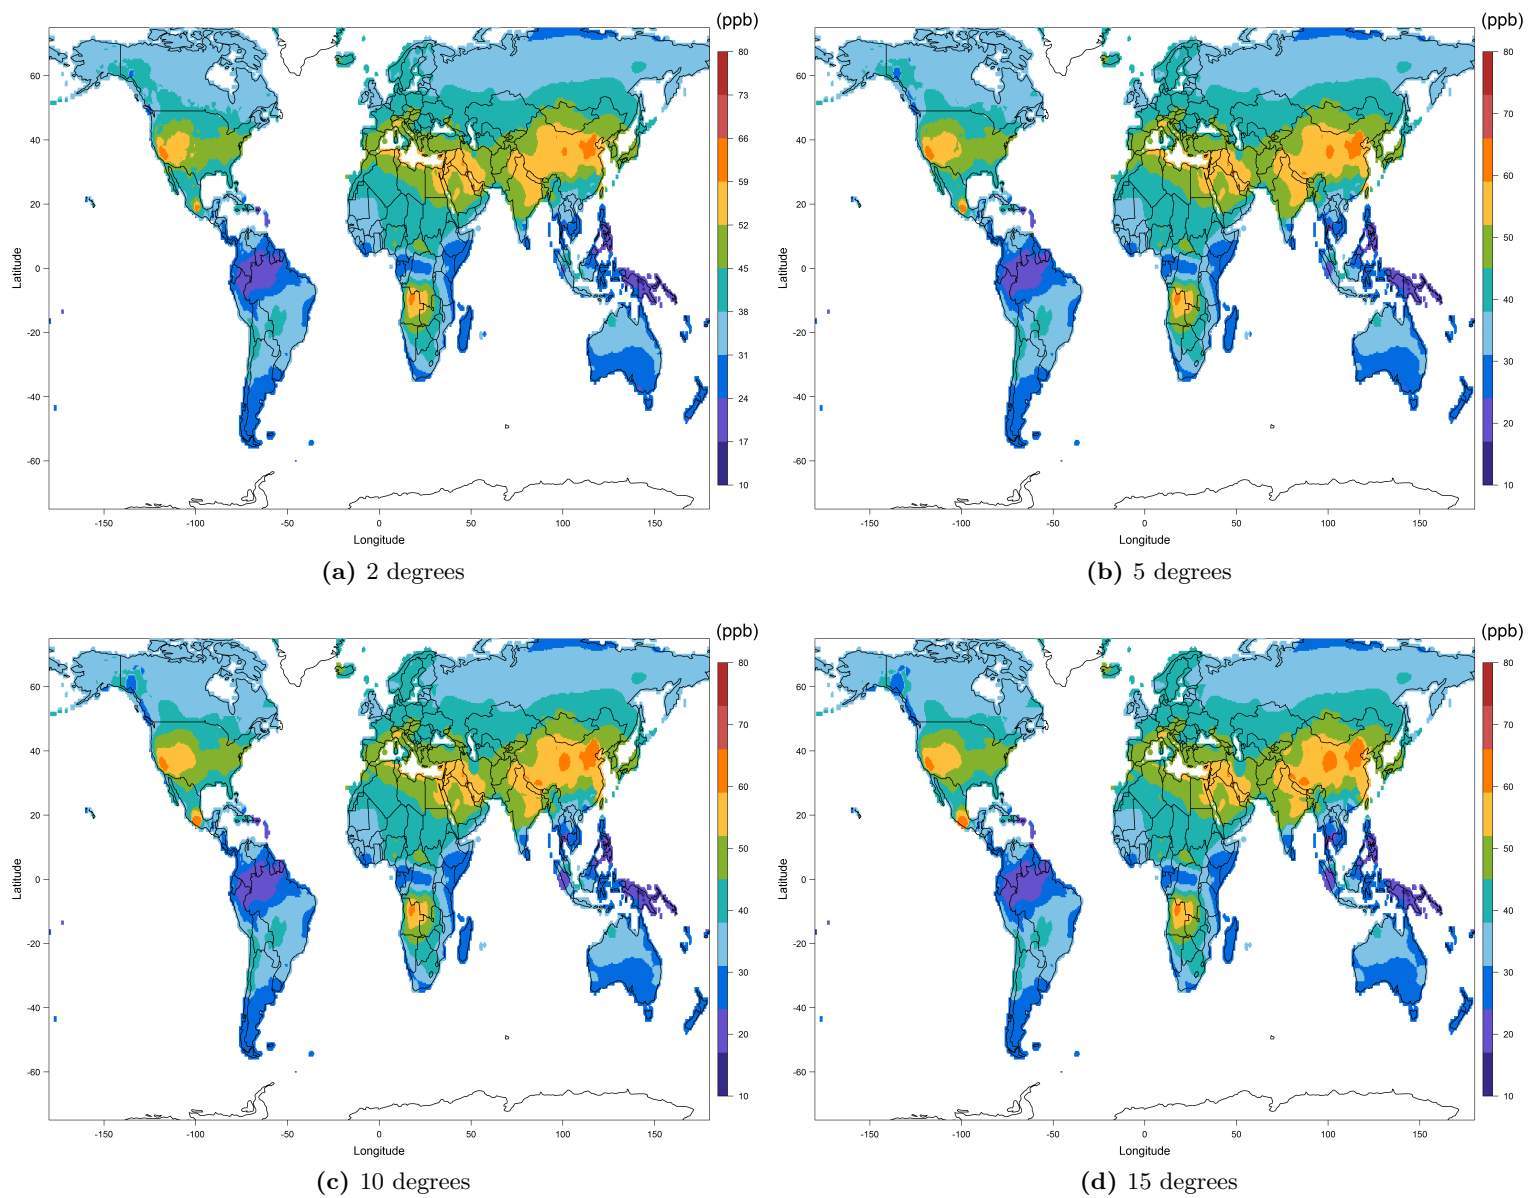

**Figure S-3:** The multi-model bias corrected surface under different ranges of correction radius.

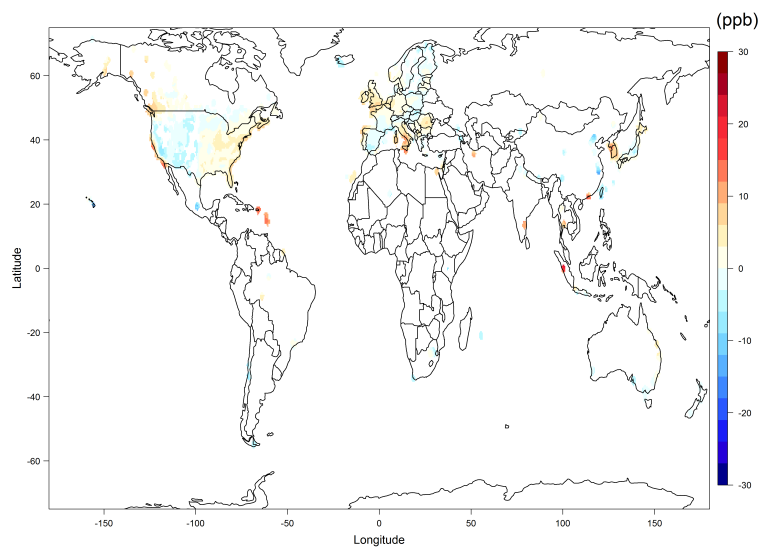

(a) 2 degrees

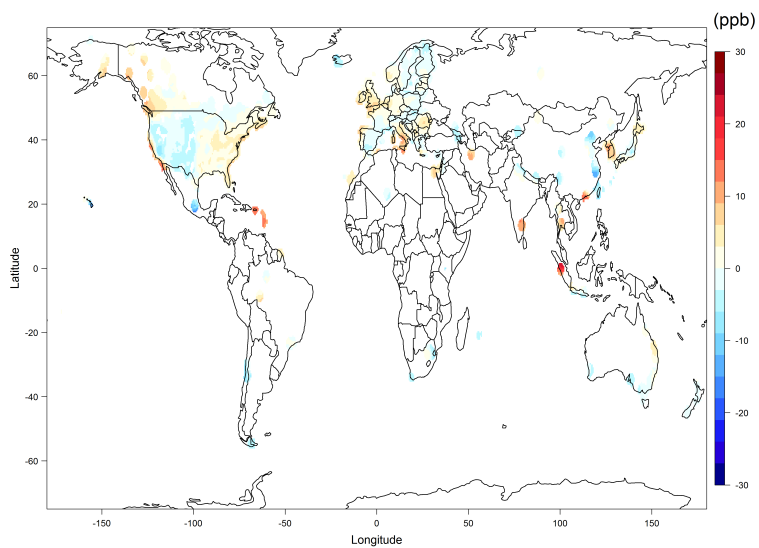

(b) 5 degrees

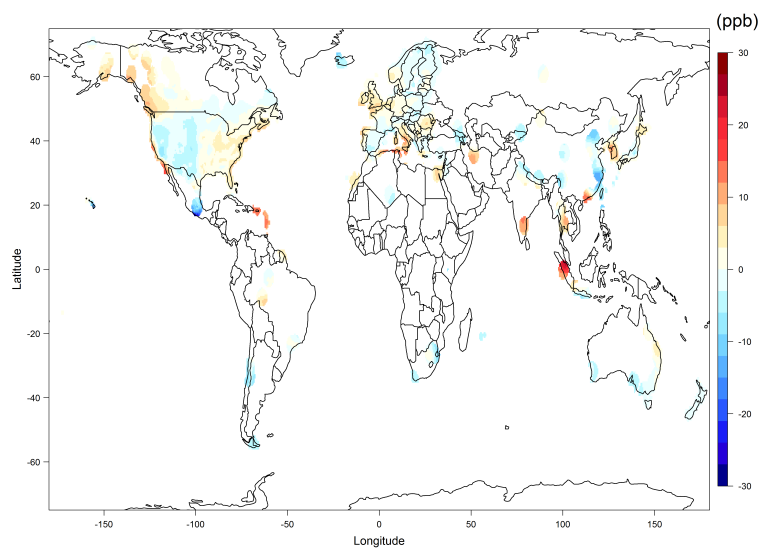

(c) 10 degrees

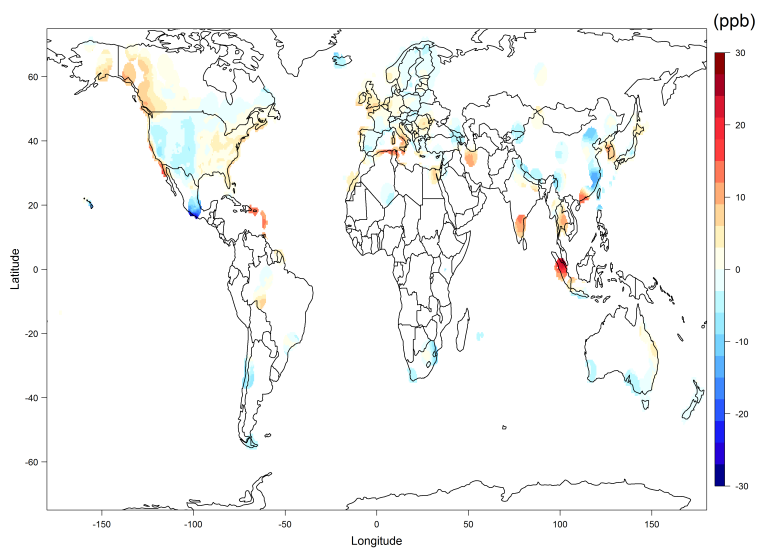

(d) 15 degrees

**Figure S-4:** Amplitudes of multi-model bias correction under different ranges of correction radius.

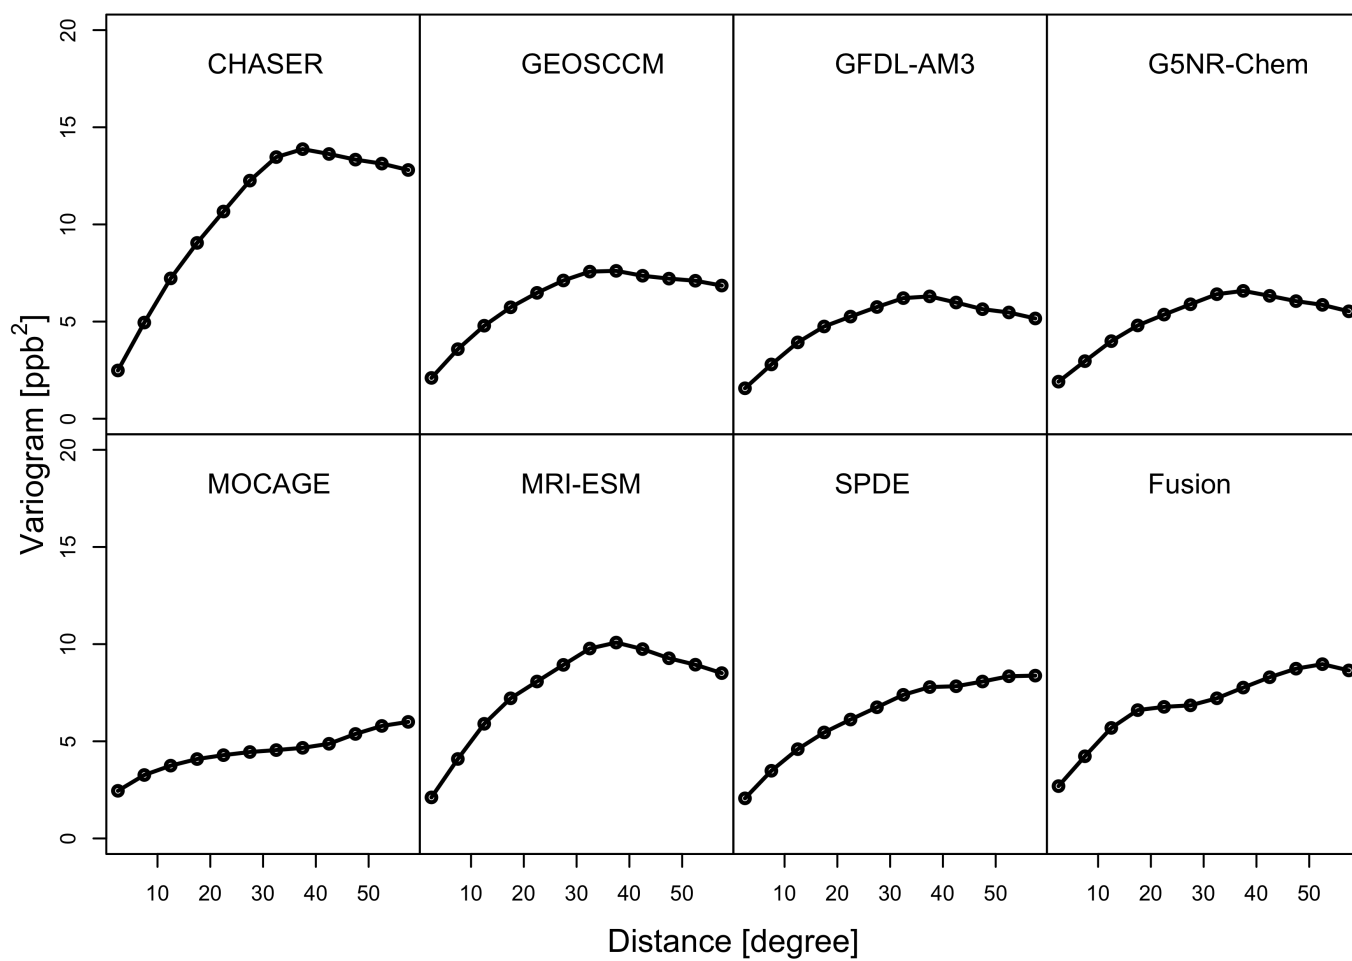

**Figure S-5:** The empirical variogram of ozone metric in North America from each model and product.
